# Supplementary material
Source: PubMed Central journal article supplement (PMC3647917)
Supplement: JCM.03109-12_zjm999092436so1.pdf [file JCM.03109-12_zjm999092436so1.pdf]

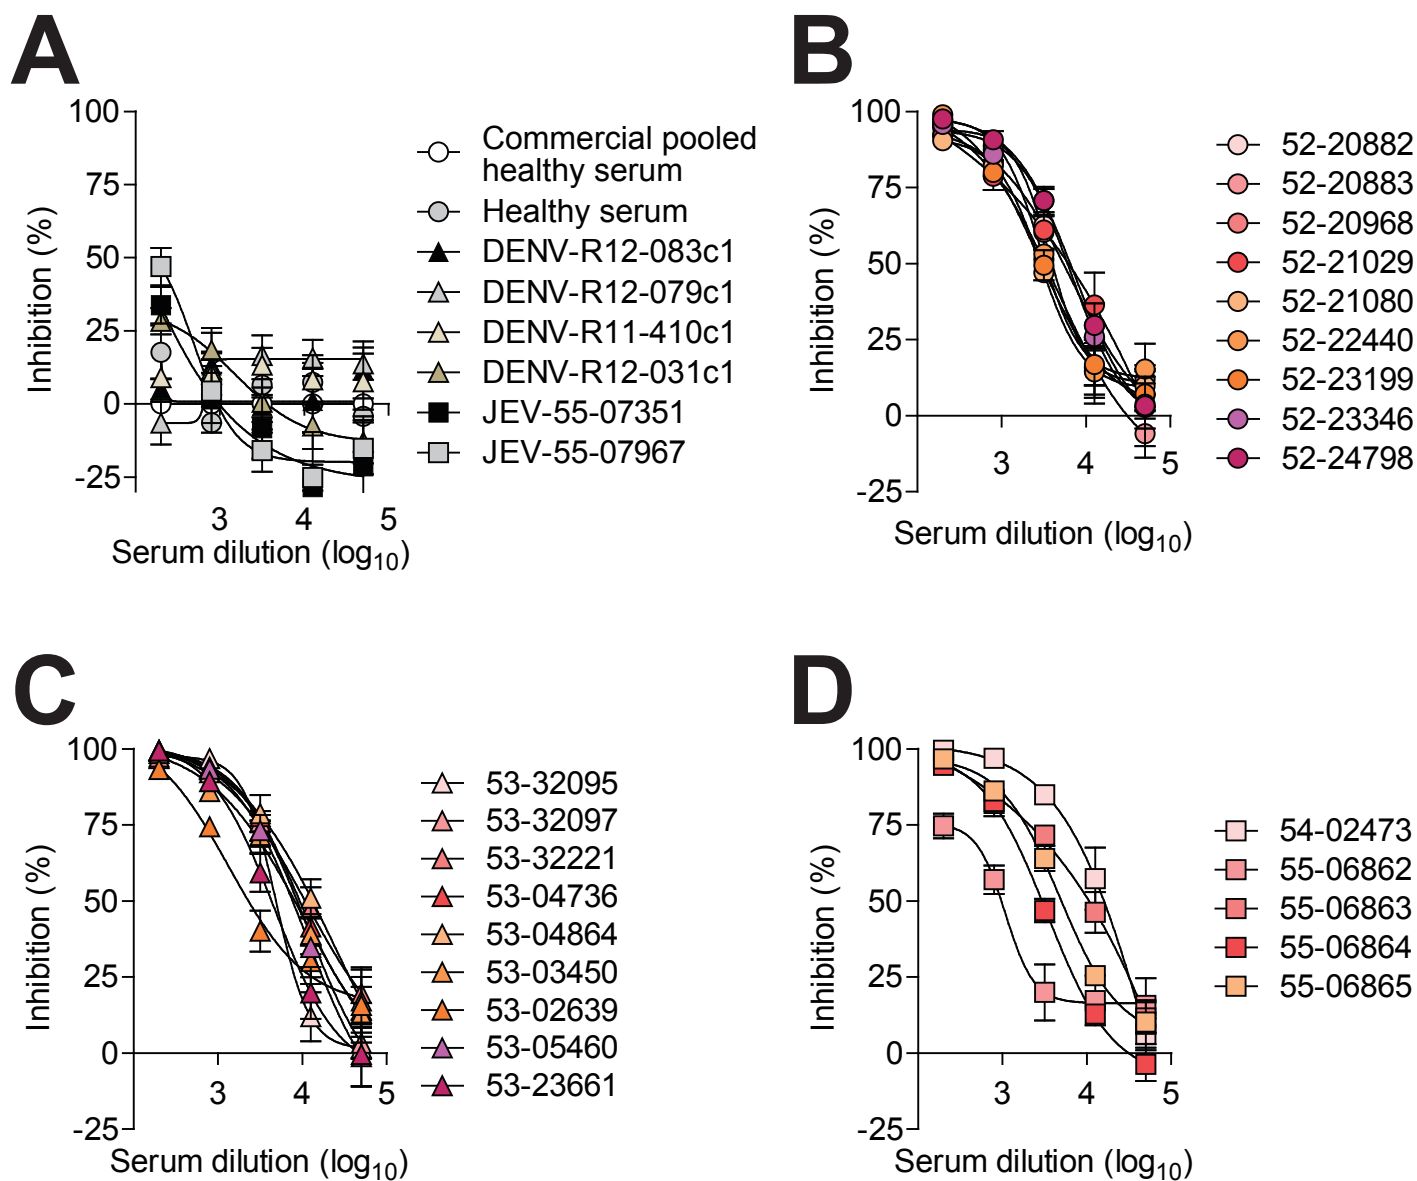

FIG. S1 Neutralization of the CHIKV-pseudotyped lentiviral vector by serum samples from chikungunya patients. (A) Two sera from healthy humans, four from DEN-positive humans and two from JE-positive humans showed little or no neutralization activity. (B, C, D) Dose-dependent neutralization of CHIKV-pseudotyped lentiviral vector was seen with serum samples from chikungunya patients collected in Thailand in 2009 (B), 2010 (C) and 2011 and 2012 (D). All error bars show the SEM of three independent experiments.
